# Supplementary material for: Structurally-discovered KLF4 variants accelerate and stabilize reprogramming to pluripotency
Source: PubMed Central journal article supplement — iScience. 2021 Dec 14;25(1):103525. doi: 10.1016/j.isci.2021.103525 (PMC8786646; doi:10.1016/j.isci.2021.103525), 2021-12-14
Supplement: mmc1.pdf [file mmc1.pdf]

**Supplemental information**

**Structurally-discovered KLF4 variants**

**accelerate and stabilize**

**reprogramming to pluripotency**

**Evgeniia Borisova, Ken Nishimura, Yuri An, Miho Takami, Jingyue Li, Dan Song, Mami Matsuo-Takasaki, Dorian Luijkx, Shiho Aizawa, Akihiro Kuno, Eiji Sugihara, Taka-aki Sato, Fumiaki Yumoto, Tohru Terada, Koji Hisatake, and Yohei Hayashi**

**Figure S1** (related to Figure 1)

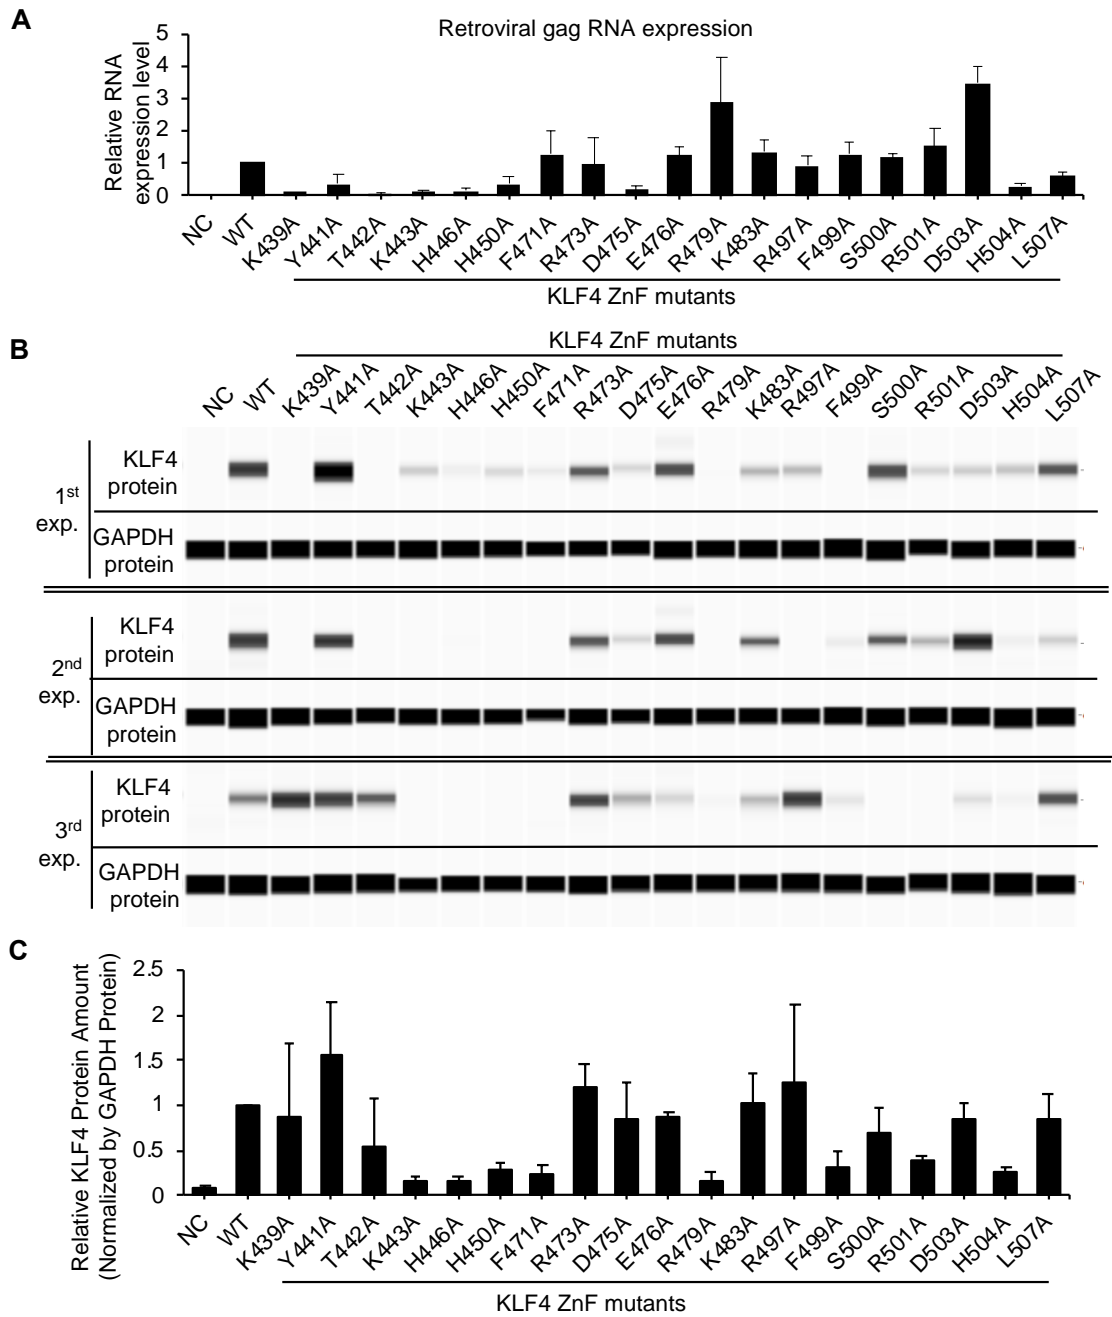

**Figure S1.** The protein expression levels of KLF4 ZnF alanine-substituted mutants transduced by retrovirus vectors.

(A) Relative retroviral gag RNA expression levels in the retroviral infected MEF after 3 days of infection. Expression levels of gag RNA were normalized by GAPDH mRNA amounts calculated from RT-qPCR. KLF4 WT RNA amount of each experiment was set as 1. Results are mean and SE, n=5.

(B) Capillary western blot data of KLF4 and GAPDH proteins in human neonatal fibroblasts 4 days after transduction of KLF4 alanine-substitute mutants. Blot images of three biological replicates are shown.

(C) Relative KLF4 protein expression levels calculated from capillary western blot data of KLF4 protein amounts normalized by GAPDH protein amounts. KLF4 WT protein amount of each experiment was set as 1. Results are mean and SE, n=3.

**Figure S2** (related to Figure 4)

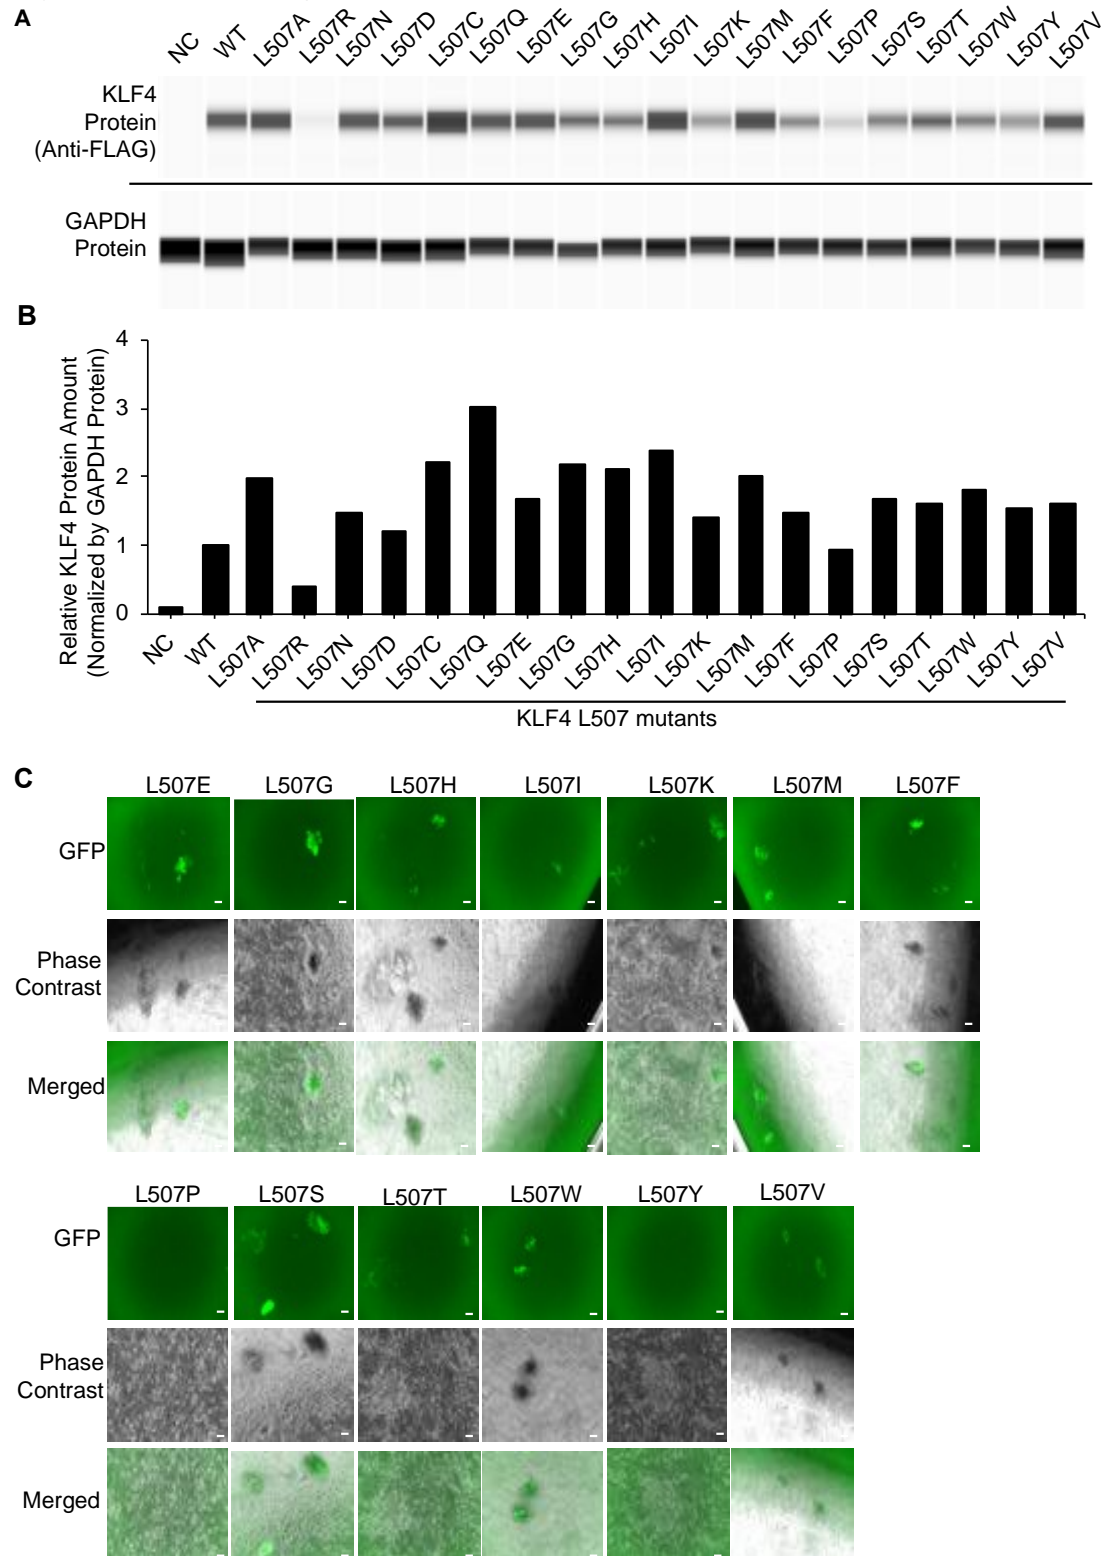

**Figure S2. The protein expression levels of KLF4 L507 mutants and iPSC colonies generated with these mutants.**

(A) A capillary western blot data of KLF4 and GAPDH proteins in human neonatal fibroblasts 4 days after transduction of KLF4 alanine-substitute mutants.

(B) Relative KLF4 protein expression levels calculated from capillary western blot data of KLF4 protein amounts normalized by GAPDH protein amounts.

KLF4 WT protein amount of each experiment was set as 1.

(C) Typical colony morphologies reprogrammed with KLF4 L507 variants (continued from Figure 4A). Scale bars, 200  $\mu\text{m}$ .

**Figure S3** (Related to Figure 4 and 5)

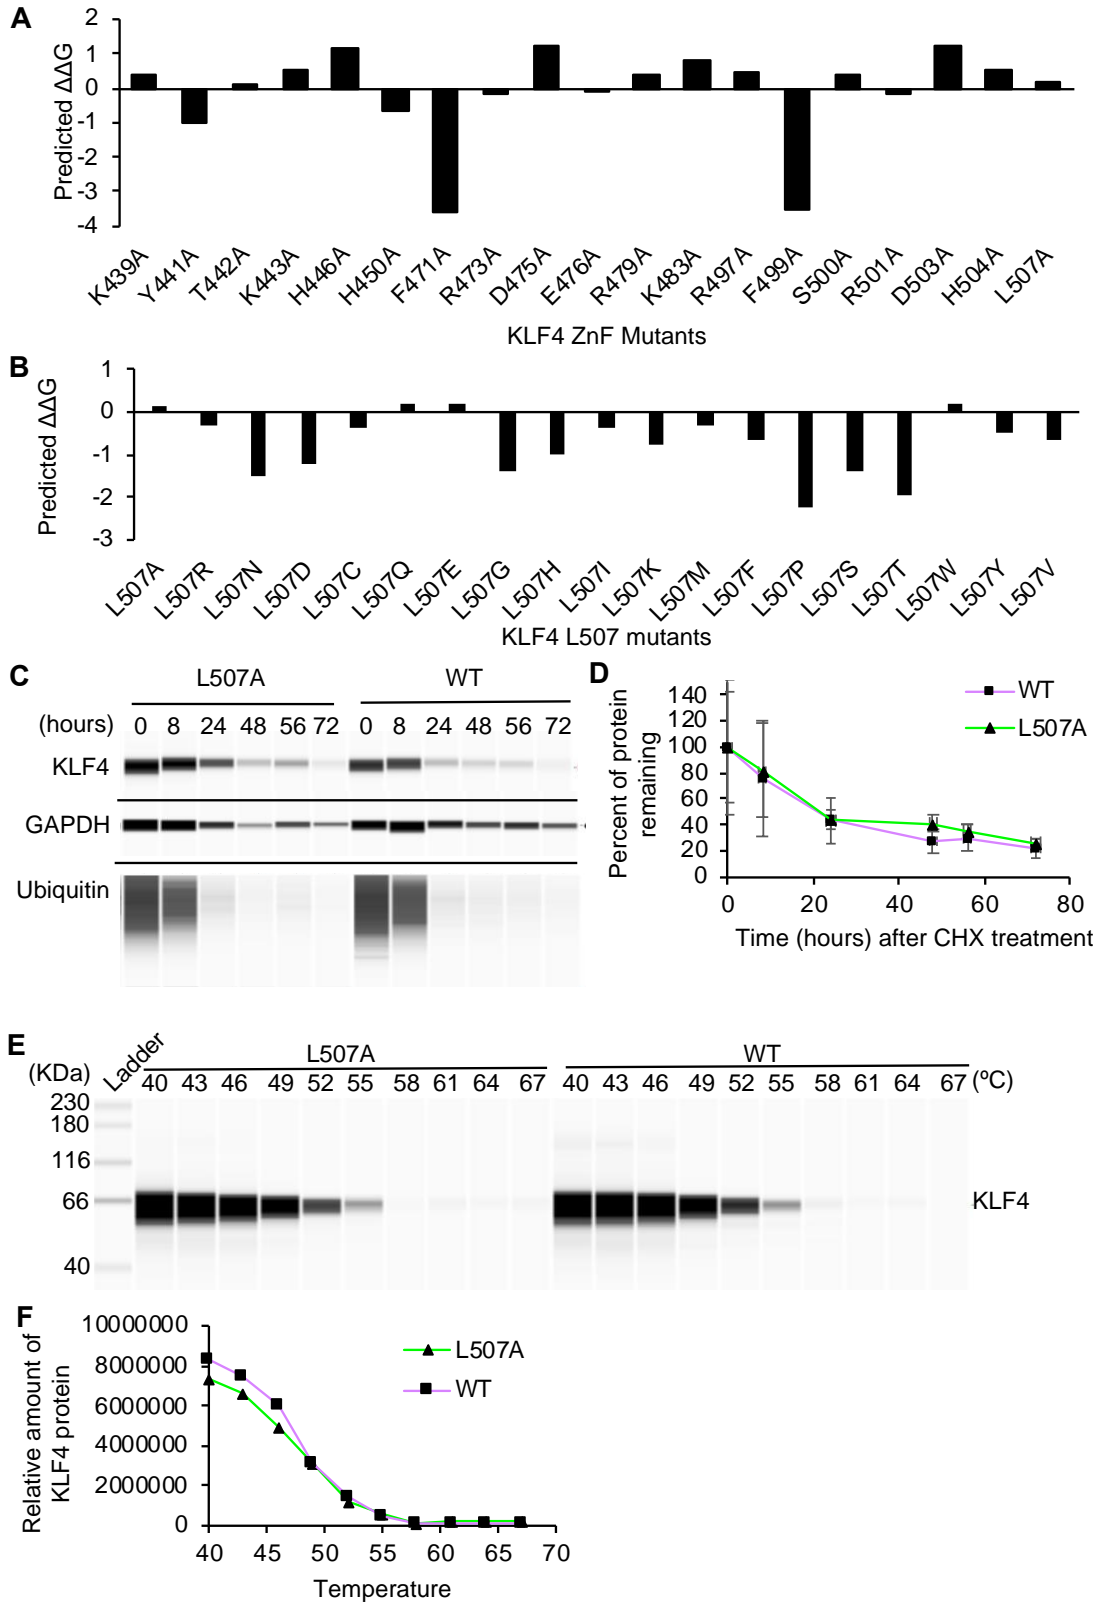

**Figure S3. The protein stability of KLF4 WT and L507A variant.**

(A and B) Computational prediction of the effect of KLF4 ZnF alanine mutants (A) and KLF4 L507 variants (B) on protein stability using X-ray crystal structure of KLF4 ZnF and DNA complex (PDB: 2WBU) by SDM (Site Directed Mutator) program.

(C) A typical capillary western blot data of KLF4, GAPDH, and ubiquitinated proteins in human neonatal fibroblasts overexpressing KLF4 WT or L507A in the time course after cycloheximide (CHX) treatment.

(D) The ratio of KLF4 protein abundance calculated from the data of capillary western blot on human neonatal fibroblasts overexpressing KLF4 WT or L507A in the time course after CHX treatment. Results are mean and SE, n=3.

(E) A capillary western blot data of KLF4 protein through after cellular thermal shift assay performed on human neonatal fibroblasts overexpressing KLF4 WT or L507A.

(F) The quantification of KLF4 protein abundance through after cellular thermal shift assay performed on human neonatal fibroblasts overexpressing KLF4 WT or L507A.

**Figure S4** (Related to Figure 5A)

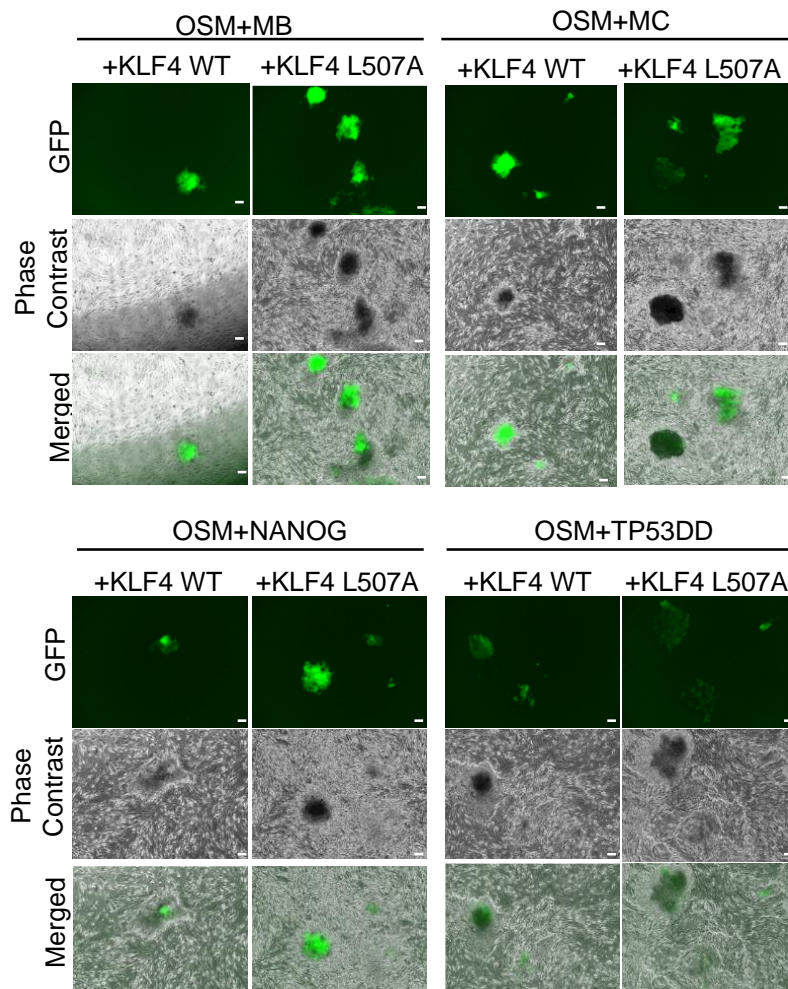

**Figure S4. Nanog-GFP colonies in reprogramming Nanog-GFP MEF transduced with KLF4 WT or L507A with pro-programming factors.**

Scale bars, 200  $\mu$ m. (continued from Figure 4A).



**Figure S5** (Related to Figure 6)

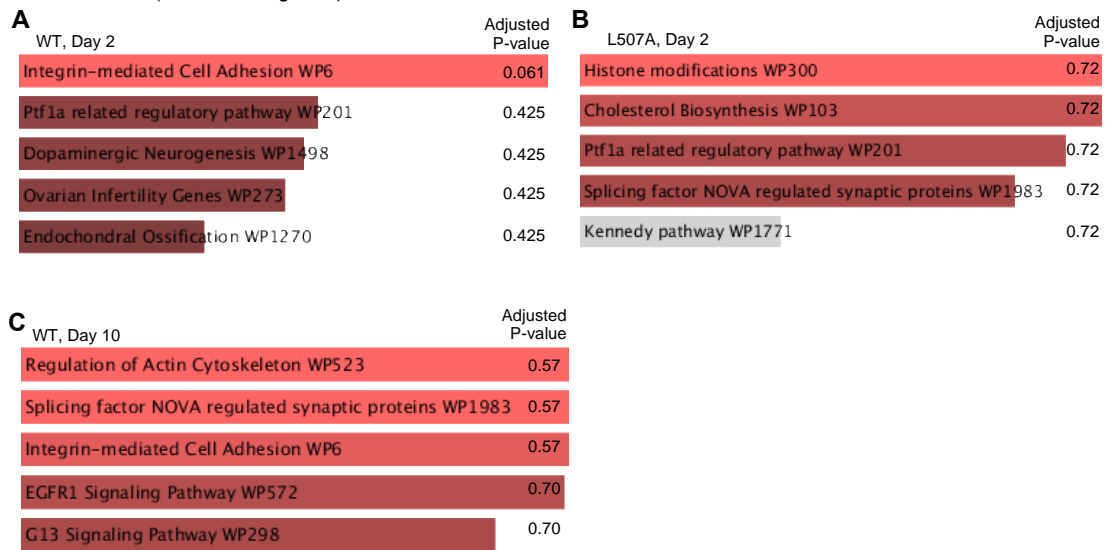

**Figure S5. Wikipathway enrichment analysis from ChIP-seq data.**

Wikipathway enrichment analysis was performed on the gene set derived from the sample of WT on day 2 (A), L507A on day 2 (B) and WT on day 10 (C). Top 5 pathways that are enriched with statistically significant are illustrated with the adjusted P-values.

**Figure S6** (Related to Figure 8)

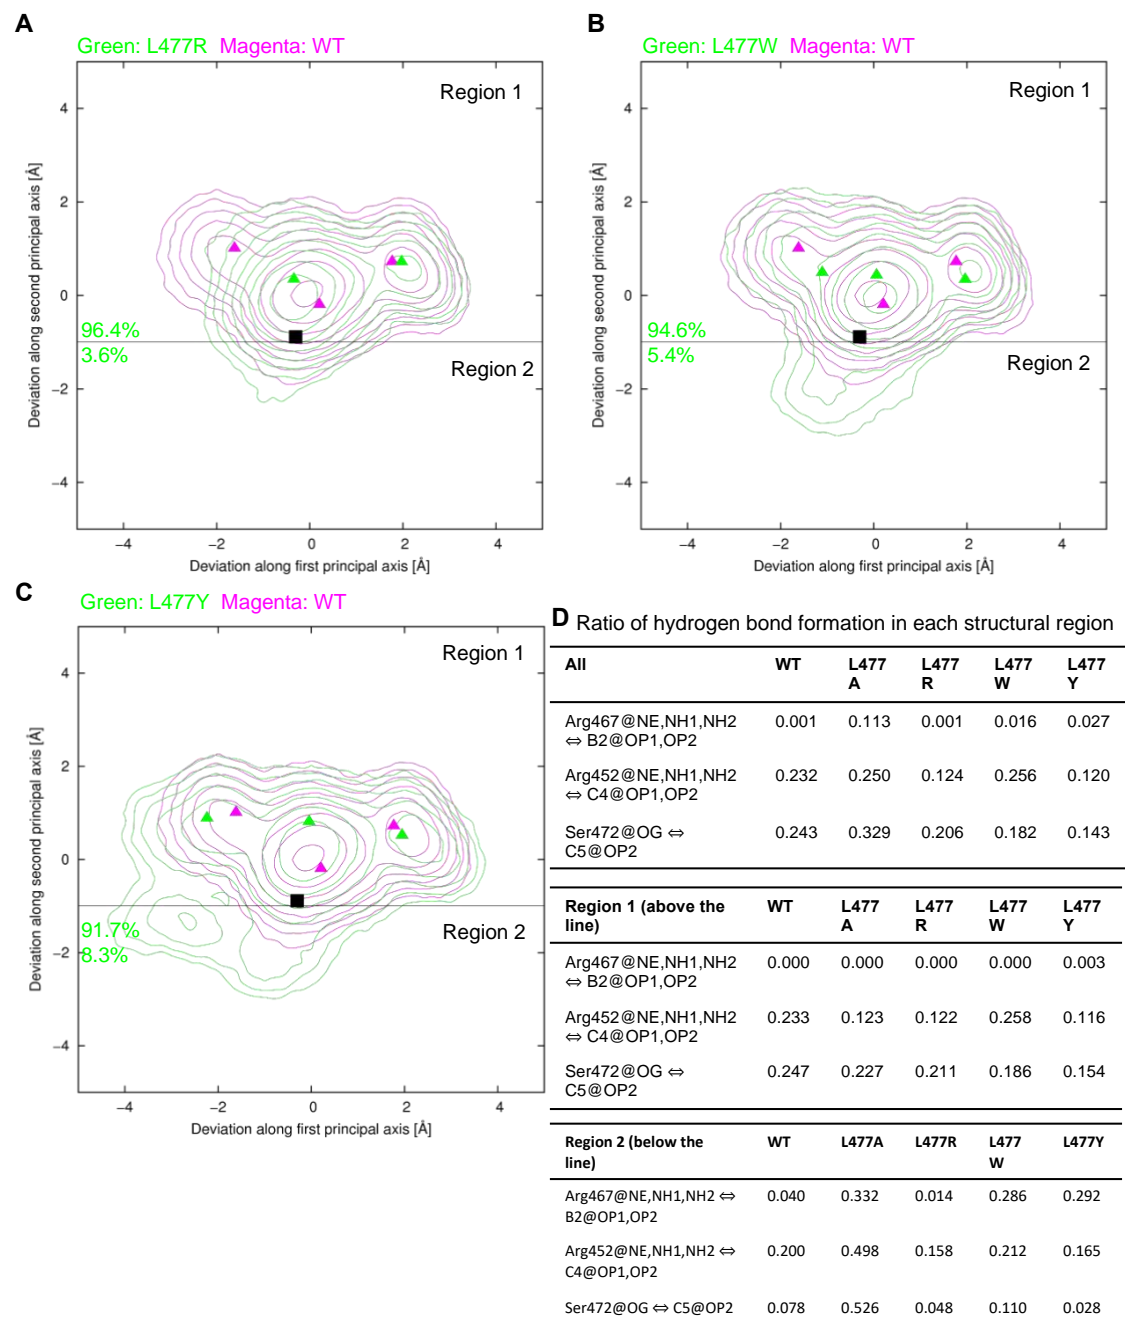

**Figure S6. MD simulation analysis of the effect of the mouse Klf4 L477 mutations (identical to human KLF4 L507) on the structure of the Klf4 ZnF-DNA complex (A-C) Conformational distribution of the mouse Klf4 (WT)-DNA complex (magenta contours) and the Klf4(L477R)-DNA complex (green contours)**

(A), the Klf4(L477W)-DNA complex (green contours) (B), or the Klf4(L477Y)-DNA complex (green contours) (C). The level of  $n$ -th contour is  $2^{n-1} \times 10^{-4}$ . The positions of the initial structure and the representative structures obtained from the cluster analysis of the MD trajectories of the Klf4(WT)-DNA and the Klf4(L477A)-DNA complexes are indicated by a black rectangle, magenta triangles, green triangles, respectively. The black line separates conventional conformation distribution, Region 1, and unique conformation distribution of the Klf4(L477A)-DNA complex as Region 2.

(D) Ratio of hydrogen bond formation in each structural region of MD simulation on Klf4 (WT)-DNA complex, Klf4 (L477A)-DNA complex, Klf4(L477R)-DNA complex (green contours), Klf4(L477W)-DNA complex (green contours), and the Klf4(L477Y)-DNA complex.

**Table S1. The list of DNA-interacting amino acid residues in KLF4 ZnF**

**domain, related to Figure 1.** The amino acid residues highlighted in gray are omitted in site mutagenesis study.

| Position within ZnF | Polypeptide numbering |            | DNA interaction determined by PDBePISA |              | Conservation among KLF2, KLF4, and KLF5 |
|---------------------|-----------------------|------------|----------------------------------------|--------------|-----------------------------------------|
|                     | Mouse Klf4            | Human KLF4 | PDB ID: 2WBU                           | PDB ID: 4M9E |                                         |
| ZnF 1               | Lys409                | Lys439     | Yes                                    | Yes          | Yes                                     |
|                     | Thr410                | Thr440     | Yes                                    | Yes          | No                                      |
|                     | Tyr411                | Tyr441     | Yes                                    | Yes          | Yes                                     |
|                     | Thr412                | Thr442     | Yes                                    | Yes          | Yes                                     |
|                     | Lys413                | Lys443     | Yes                                    | Yes          | Yes                                     |
|                     | Ser415                | Ser445     | No                                     | Yes          | Yes                                     |
|                     | His416                | His446     | Yes                                    | Yes          | Yes                                     |
|                     | Ala419                | Ala449     | Yes                                    | Yes          | Yes                                     |
|                     | His420                | His450     | Yes                                    | Yes          | Yes                                     |
| ZnF 2               | Thr423                | Thr453     | Yes                                    | No           | Yes                                     |
|                     | Phe441                | Phe471     | Yes                                    | Yes          | Yes                                     |
|                     | Arg443                | Arg473     | Yes                                    | Yes          | Yes                                     |
|                     | Asp445                | Asp475     | Yes                                    | Yes          | Yes                                     |
|                     | Glu446                | Glu476     | Yes                                    | Yes          | Yes                                     |
|                     | Arg449                | Arg479     | Yes                                    | Yes          | Yes                                     |
|                     | Lys453                | Lys483     | Yes                                    | Yes          | Yes                                     |
| ZnF 3               | Arg458                | Arg488     | Yes                                    | No           | No                                      |
|                     | Arg467                | Arg497     | Yes                                    | Yes          | Yes                                     |
|                     | Phe469                | Phe499     | Yes                                    | Yes          | Yes                                     |
|                     | Ser470                | Ser500     | Yes                                    | Yes          | Yes                                     |
|                     | Arg471                | Arg501     | Yes                                    | Yes          | Yes                                     |
|                     | Asp473                | Asp503     | Yes                                    | Yes          | Yes                                     |
|                     | His474                | His504     | Yes                                    | Yes          | Yes                                     |
|                     | Leu477                | Leu507     | Yes                                    | Yes          | Yes                                     |

**Table S2. The list of primer sequence for making KLF4 alanine mutants, related to STAR Methods.**

| No.      | Name | Sequence (5 - 3)                    |
|----------|------|-------------------------------------|
| 1-1 (FW) | 439  | TGCGGCGCAACCTACACAAAGAGTTC          |
| 1-2 (RV) |      | GTAGGTTGCGCCGCAGCCCGCGTAATC         |
| 2-1      | 441  | AAAACCGCCACAAAGAGTTCCCATCTC         |
| 2-2      |      | CTTTGTGGCGGTTTTGCCGCAG              |
| 3-1      | 442  | ACCTACGCAAAGAGTTCCCATCTCAAGGCACACC  |
| 3-2      |      | CTTTGCGTAGGTTTTGCCGCAGCCCG          |
| 4-1      | 443  | TACACAGCGAGTTCCCATCTCAAGGCACACCTGCG |
| 4-2      |      | TACTCGCTGTGTAGGTTTTGCCGCAGCCCG      |
| 5-1      | 446  | AGTCCGCTCTCAAGGCACACCTGCGAAC        |
| 5-2      |      | GAGAGCGGAACCTTTTGTGTAGGTTTTGCCGCAGC |
| 6-1      | 450  | AAGGCAGCCCTGCGAACCCACACAGGTGAGAAACC |
| 6-2      |      | CAGGGCTGCCTTGAGATGGGAACTCTTTGTGTAGG |
| 7-1      | 471  | TGGAAAGCCGCCCGCTCAGATGAACT          |
| 7-2      |      | GCGGGCGGCTTTCCATCCACAGCCGTC         |
| 8-1      | 473  | TTCGCCGCCTCAGATGAACTGACCAG          |
| 8-2      |      | ATCTGAGGCGGCGAATTTCCATCCACA         |
| 9-1      | 475  | CGCTCAGCTGAACTGACCAGGCACTA          |
| 9-2      |      | CAGTTCAGCTGAGCGGGCGAATTTCC          |
| 10-1     | 476  | TCAGATGCACTGACCAGGCACTACCG          |
| 10-2     |      | GGTCAGTGCATCTGAGCGGGCGAATT          |
| 11-1     | 479  | CTGACCGCGCACTACCGTAAACACAC          |
| 11-2     |      | GTAGTGCGCGGTGAGTTCATCTGAGCG         |
| 12-1     | 483  | TACCGTGACACACGCGGGCACCGCCCG         |
| 12-2     |      | CGTGTGTGCACGGTAGTGCCTGGTCAGTTCATCTG |
| 13-1     | 497  | TGCGACGCAGCATTTCAGGTCGGA            |
| 13-2     |      | AAATGCTGCGTCGCATTTTTGGCACTG         |
| 14-1     | 499  | CGAGCAGCTTCCAGGTCGGACCACCT          |
| 14-2     |      | CCTGGAAGCTGCTCGGTGCGCATTTTTG        |
| 15-1     | 500  | AGCATTTGCCAGGTCGGACCACCTCG          |
| 15-2     |      | GACCTGGCAAATGCTCGGTGCGATTT          |
| 16-1     | 501  | TTTTCCGCGTCGGACCACCTCGCCTT          |
| 16-2     |      | GTCCGACGCGGAAAATGCTCGGTGCGCA        |
| 17-1     | 503  | AGGTCGGCCCACCTCGCCTTACACAT          |
| 17-2     |      | GAGGTGGGCCGACCTGGAAAATGCTC          |
| 18-1     | 504  | TCGGACGCCCTCGCCTTACACATGAA          |
| 18-2     |      | GGCGAGGGCGTCCGACCTGGAAAATGC         |
| 19-1     | 507  | CTCGCCGCACACATGAAGAGGCATTT          |
| 19-2     |      | CATGTGTGCGGCGAGGTGGTCCGACC          |

**Table S3. The list of plasmids made in this study, related to STAR****Methods.**

| Plasmid Name            | RIKEN DNA Bank RDB No. |
|-------------------------|------------------------|
| pMXs-3xFLAG-KLF4        | 19004                  |
| pMXs-3xFLAG-KLF4(K439A) | 19005                  |
| pMXs-3xFLAG-KLF4(Y441A) | 19006                  |
| pMXs-3xFLAG-KLF4(T442A) | 19007                  |
| pMXs-3xFLAG-KLF4(K443A) | 19008                  |
| pMXs-3xFLAG-KLF4(H446A) | 19009                  |
| pMXs-3xFLAG-KLF4(H450A) | 19010                  |
| pMXs-3xFLAG-KLF4(F471A) | 19011                  |
| pMXs-3xFLAG-KLF4(R473A) | 19012                  |
| pMXs-3xFLAG-KLF4(D475A) | 19013                  |
| pMXs-3xFLAG-KLF4(E476A) | 19014                  |
| pMXs-3xFLAG-KLF4(R479A) | 19015                  |
| pMXs-3xFLAG-KLF4(K483A) | 19016                  |
| pMXs-3xFLAG-KLF4(R497A) | 19017                  |
| pMXs-3xFLAG-KLF4(F499A) | 19018                  |
| pMXs-3xFLAG-KLF4(S500A) | 19019                  |
| pMXs-3xFLAG-KLF4(R501A) | 19020                  |
| pMXs-3xFLAG-KLF4(D503A) | 19021                  |
| pMXs-3xFLAG-KLF4(H504A) | 19022                  |
| pMXs-3xFLAG-KLF4(L507A) | 19023                  |
| pMXs-3xFLAG-KLF4(L507R) | 19024                  |
| pMXs-3xFLAG-KLF4(L507N) | 19025                  |
| pMXs-3xFLAG-KLF4(L507D) | 19026                  |
| pMXs-3xFLAG-KLF4(L507C) | 19027                  |
| pMXs-3xFLAG-KLF4(L507Q) | 19028                  |
| pMXs-3xFLAG-KLF4(L507E) | 19029                  |
| pMXs-3xFLAG-KLF4(L507G) | 19030                  |
| pMXs-3xFLAG-KLF4(L507H) | 19031                  |
| pMXs-3xFLAG-KLF4(L507I) | 19032                  |
| pMXs-3xFLAG-KLF4(L507K) | 19033                  |
| pMXs-3xFLAG-KLF4(L507M) | 19034                  |
| pMXs-3xFLAG-KLF4(L507F) | 19035                  |
| pMXs-3xFLAG-KLF4(L507P) | 19036                  |
| pMXs-3xFLAG-KLF4(L507S) | 19037                  |
| pMXs-3xFLAG-KLF4(L507T) | 19038                  |
| pMXs-3xFLAG-KLF4(L507W) | 19039                  |
| pMXs-3xFLAG-KLF4(L507Y) | 19040                  |
| pMXs-3xFLAG-KLF4(L507V) | 19041                  |
